# Supplementary material for: Feasibility of repetitive transcranial magnetic stimulation on non-motor symptoms of spinocerebellar ataxia type 3: a secondary analysis of a randomized clinical trial
Source: Front Neurol. 2025 May 23;16:1567292. doi: 10.3389/fneur.2025.1567292 (PMC12144670; doi:10.3389/fneur.2025.1567292)
Supplement: Supplementary file 1 [file Supplementary_file_1.xlsx]

## Sheet: eTable1
eTable 1 Individual demographic, clinical, and genetic characteristics at baseline.
#	Sex	Education (y)	Age at enrolment (y)	Age at onset (y)	Disease duration (y)	Number of normal CAG repeats	Number of expanded CAG repeats	Baseline SARA scores (points)	Baseline ICARS scores (points)	PSQI of pre-rTMS	AIS of pre-rTMS	MMSE of pre-rTMS	MoCA of pre-rTMS	HARS of pre-rTMS	HDRS of pre-rTMS	PSQI of post-rTMS	AIS of post-rTMS	MMSE of post-rTMS	MoCA of post-rTMS	HARS of post-rTMS	HDRS of post-rTMS
Real rTMS group
1	Female	12	39	38	5	29	76	10	30	3	1	29	24	14	13	2	0	29	27	6	8
2	Male	9	40	34	9	14	72	17	45	15	9	30	23	17	13	8	4	30	23	13	14
3	Female	2	49	40	9	27	75	22	58	20	15	22	14	30	26	13	10	24	23	11	19
4	Female	16	39	22	18	14	81	27	62	15	18	26	23	25	29	9	9	26	27	12	24
5	Male	9	18	14	3	20	74	5	14	5	6	28	26	18	19	6	5	29	27	31	20
6	Female	1	52	39	12	27	75	13	34	16	16	26	14	25	24	15	13	28	21	34	23
7	Male	6	49	39	10	14	75	18	48	7	3	26	23	25	17	5	8	27	23	24	19
8	Female	16	32	24	8	28	79	11	35	8	7	30	28	27	23	2	2	30	30	12	15
9	Male	16	30	19	11	14	79	22.5	62	11	7	26	26	16	19	11	8	28	28	14	17
10	Male	9	56	46	9	14	70	12	28	5	3	28	22	11	23	6	7	28	23	6	20
11	Female	16	46	50	15	14	77	22.5	62	2	1	28	26	15	10	1	2	28	29	8	10
12	Female	0	43	34	8	21	66	24	54	11	11	25	16	15	23	12	11	28	21	7	17
13	Female	9	30	26	3	30	79	8.5	20	15	9	24	21	28	17	9	6	28	23	20	17
14	Male	6	62	48	13	14	73	19	48	13	21	19	8	31	35	8	3	23	6	4	12
15	Male	9	35	25	9	27	80	17.5	47	17	7	29	28	10	14	0	0	29	28	7	4
16	Male	9	45	37	8	14	75	10	32	12	12	25	22	27	22	5	7	28	26	12	14
17	Female	0	64	63	15	14	72	9	28	13	10	24	13	31	25	8	3	24	13	21	14
18	Female	9	44	31	12	28	74	8.5	20	15	10	29	27	35	20	8	2	29	27	16	11
19	Male	9	39	30	9	19	78	12	26	19	9	29	25	18	26	12	7	30	27	10	14
20	Female	16	52	42	9	14	72	11	31	9	8	30	27	13	17	7	3	30	29	5	12
21	Male	16	57	41	16	14	74	27.5	68	13	16	21	12	28	38	9	9	23	15	17	23
Sham rTMS group
1	Female	12	58	49	9	14	74	8.5	18	10	6	26	19	23	16	5	4	29	26	13	16
2	Male	9	46	34	12	14	72	14.5	42	10	7	30	22	35	28	7	7	30	24	13	19
3	Female	16	31	21	10	27	80	15.5	35	7	3	30	26	28	26	4	2	30	28	14	16
4	Female	9	57	52	5	27	71	7.5	19	4	4	25	20	11	4	5	5	27	22	11	5
5	Female	12	28	22	6	44	80	6	14	5	6	30	25	20	17	2	3	30	28	14	14
6	Female	9	46	41	5	14	72	8	17	8	11	28	20	26	24	7	7	28	27	11	22
7	Female	12	51	44	7	14	73	13	39	15	11	30	23	29	28	8	7	30	26	20	26
8	Male	16	51	35	15	14	77	22.5	62	13	12	29	27	13	12	13	9	29	28	5	13
9	Female	4	52			14	76	18	49	20	21	22	14	32	36	10	8	24	16	35	27
10	Male	9	48	31	17	29	76	14.5	41	16	22	29	21	33	38	9	8	29	26	24	19
11	Female	9	45	39	6	27	74	12.5	33	12	9	30	26	20	18	8	9	30	28	13	12
12	Female	12	26	22	4	14	83	12.5	29	2	2	29	26	7	11	1	1	28	27	3	7
13	Male	9	34	25	9	28	76	10	28	3	3	28	18	9	12	2	3	27	18	6	5
14	Male	9	63	40	23	14	72	22.5	59	10	3	22	14	31	37	8	9	21	13	28	32
15	Male	16	40	32	8	14	78	8.5	24	10	14	29	23	15	18	11	9	26	28	19	22
16	Male	9	26	23	3	23	77	11	29	9	9	28	25	8	8	4	6	29	25	3	6
Abbreviation: SARA = Scale for the Assessment and Rating of Ataxia; ICARS = International Cooperative Ataxia Rating Scale; PSQI = the Pittsburgh Sleep Quality Index; AIS = Athens Insomnia Scale; MMSE = Mini-Mental State Examination; MoCA = Montreal Cognitive Assessment; HARS = Hamilton Anxiety Rating Scale; HDRS = Hamilton Depression Rating Scale; rTMS = repetitive transcranial magnetic stimulati…

## Sheet: eTable 2
eTable 2 Study outcomes of the two groups.
Variables	Real rTMS group				Sham rTMS group
	Baseline	Day 15	Mean Difference (95%CI)	p-value	Baseline	Day 15	Mean Difference (95%CI)	p-value
PSQI	11.6 (5.1)	7.4 (4.0)	-4.19 (-5.94, -2.44)	＜0.001	9.6 (4.9)	6.5 (3.4)	-3.13 (-4.59, 1.66)	＜0.001
AIS	9.5 (5.4)	5.7 (3.7)	-3.81 (-5.90, -1.72)	＜0.001	8.9 (6.1)	6.1 (2.7)	-2.88 (-5.20, -0.55)	0.015
MMSE	26.3 (3.0)	27.6 (2.2)	1.19 (0.61, 1.78)	＜0.001	27.8 (2.4)	27.9 (1.4)	0.13 (-0.54, 0.79)	0.714
MoCA	21.3 (5.9)	23.6 (5.8)	2.29 (1.22, 3.35)	＜0.001	21.8 (4.0)	24.4 (4.6)	2.56 (1.44, 3.68)	＜0.001
HARS	21.9 (7.4)	13.8 (8.1)	-8.05 (-11.79, -4.31)	＜0.001	21.3 (9.7)	14.5 (9.0)	-6.75 (-9.92, -3.58)	＜0.001
HDRS	21.6 (6.0)	15.6 (6.0)	-6.00 (-8.56, -3.44)	＜0.001	20.8 (10.6)	16.3 (8.2)	-4.50 (-7.14, -7.86)	0.001
Abbreviation: PSQI = the Pittsburgh Sleep Quality Index; AIS = Athens Insomnia Scale; MMSE = Mini-Mental State Examination; MoCA = Montreal Cognitive Assessment; HARS = Hamilton Anxiety Rating Scale; HDRS = Hamilton Depression Rating Scale; rTMS = repetitive transcranial magnetic stimulation. Values are expressed as mean (standard deviation [SD]).
